# Supplementary material for: Feasibility of Ultra-Low-Dose CT for Bronchoscopy of Peripheral Lung Lesions
Source: MDPI journal article supplement (doi:10.3390/medicina56090479), 2020-09-19
Supplement: s1 [file s1]

Supplementary figure 1. Measurement of objective image noise.

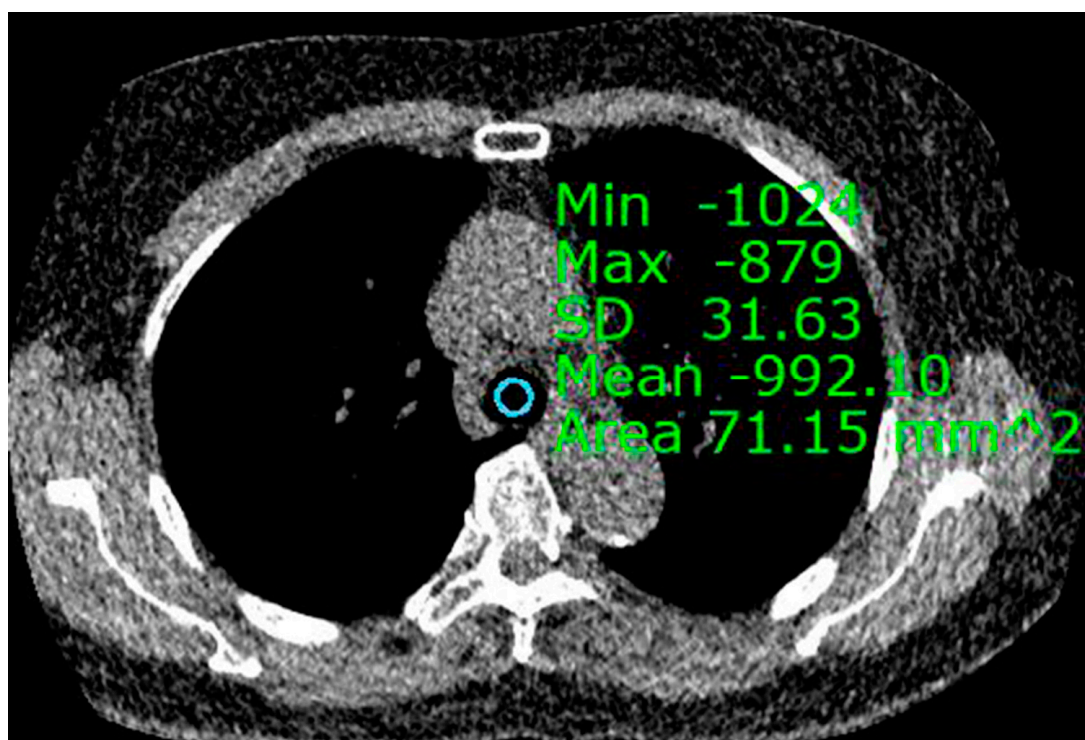

Supplementary table 1. Patient demographics\*

|             | Group 1<br>(n = 24) | Group 2<br>(n = 20) | Group 3<br>(n = 24) | Group 4<br>(n = 23) | P-value |
|-------------|---------------------|---------------------|---------------------|---------------------|---------|
| Age         | 64.5 (60.3-73.8)    | 69.0 (59.8-74.0)    | 71.5 (66.0-77.8)    | 68.0 (59.0-74.0)    | 0.159   |
| Male gender | 14 (58.3)           | 13 (65.0)           | 12 (50.0)           | 16 (69.6)           | 0.549   |
| BMI         | 23.1 (20.8-24.7)    | 23.0 (20.8-25.0)    | 22.8 (20.8-23.9)    | 23.6 (21.5-25.8)    | 0.881   |

BMI = body mass index.

\*Data was presented as numbers (%) or medians (interquartile range), as appropriate.

Supplementary table 2. Clinical diagnosis of 72 patients who received bronchoscopy.

| Variables                                     | No. (%) |
|-----------------------------------------------|---------|
| Diagnosed with bronchoscopy                   |         |
| Lung cancer                                   | 48 (67) |
| Lung metastasis from extrathoracic malignancy | 4 (6)   |
| Pulmonary tuberculosis                        | 3 (4)   |
| Organizing pneumonia                          | 1 (1)   |
| Undiagnosed with bronchoscopy                 |         |
| Lung cancer                                   | 7 (10)  |
| Lung metastasis from extrathoracic malignancy | 1 (1)   |
| Pulmonary tuberculosis                        | 1 (1)   |
| Non-tuberculous mycobacterial lung disease    | 1 (1)   |
| Unknown                                       | 6 (8)   |
